# Supplementary material
Source: PubMed Central journal article supplement (PMC4738071)
Supplement: NIHMS725401-supplement-supplement_1.pdf [file NIHMS725401-supplement-supplement_1.pdf]

Prescott et al. 2015

Supplementary Table 1. Association of LTL with incident RA risk by seropositivity status in the Nurses' Health Studies and the Women's Health Study combined<sup>a</sup>

|                                     | Seronegative |       |                   |             | Seropositive |      |             | p-het |
|-------------------------------------|--------------|-------|-------------------|-------------|--------------|------|-------------|-------|
|                                     | Controls     | Cases | OR                | 95% CI      | Cases        | OR   | 95% CI      |       |
| Shortest tertile                    | 271          | 33    | 1.00              |             | 43           | 1.00 |             |       |
| Intermediate                        | 275          | 47    | 1.10 <sup>d</sup> | 0.29 – 4.12 | 55           | 1.10 | 0.47 – 2.58 |       |
| Longest tertile                     | 281          | 43    | 1.15              | 0.48 – 2.76 | 75           | 1.74 | 1.15 – 2.64 |       |
| Per standard deviation <sup>b</sup> |              |       | 1.05              | 0.75 – 1.48 |              | 1.24 | 1.04 – 1.47 |       |
| P-trend <sup>c</sup>                |              |       | 0.76              |             |              | 0.01 |             | 0.37  |

Ca=cases; Co=controls; OR=odds ratio; CI=confidence interval; BMI=body mass index

<sup>a</sup>Meta-analysis used to combine estimates from polytomous logistic regression analyses adjusted for the same covariates listed in Table 2.

<sup>b</sup>Nurses' Health Study LTL standard deviation = 0.26; Women's Health Study LTL standard deviation = 0.71

<sup>c</sup>Based on per standard deviation analysis

<sup>d</sup>Significant heterogeneity between studies (p=0.02)

Prescott et al. 2015

Supplementary Table 2. Association of LTL with incident RA risk by HLA-DRB1 status in the Nurses' Health Studies<sup>a</sup>

|                                     | HLA-DRB1 SE non-carrier |      |             | HLA-DRB1 SE carrier |      |             | P-het |
|-------------------------------------|-------------------------|------|-------------|---------------------|------|-------------|-------|
|                                     | Ca/Co                   | OR   | 95% CI      | Ca/Co               | OR   | 95% CI      |       |
| Shortest tertile                    | 35/113                  | 1.00 |             | 51/85               | 1.00 |             |       |
| Intermediate                        | 46/111                  | 2.56 | 1.42 – 4.63 | 40/80               | 1.22 | 0.68 – 2.18 |       |
| Longest tertile                     | 20/120                  | 1.88 | 1.02 – 3.47 | 31/75               | 1.56 | 0.88 – 2.78 |       |
| Per standard deviation <sup>b</sup> |                         | 1.25 | 0.99 – 1.58 |                     | 1.14 | 0.91 – 1.42 |       |
| P-trend <sup>c</sup>                |                         | 0.06 |             |                     | 0.26 |             | 0.45  |

Ca=cases; Co=controls; OR=odds ratio; CI=confidence interval

<sup>a</sup>Unconditional logistic regression analyses adjusted for the same covariates listed in Table 2<sup>b</sup>Nurses' Health Study LTL standard deviation = 0.26<sup>c</sup>Based on per standard deviation analysis

| <b>Supplementary Table 3. Past Studies of Leukocyte Telomere Length (LTL) in Rheumatoid Arthritis</b> |                                                                                                                                      |                           |                                    |                                            |                                                                                                                          |                                                                                                                                                                            |             |
|-------------------------------------------------------------------------------------------------------|--------------------------------------------------------------------------------------------------------------------------------------|---------------------------|------------------------------------|--------------------------------------------|--------------------------------------------------------------------------------------------------------------------------|----------------------------------------------------------------------------------------------------------------------------------------------------------------------------|-------------|
| <b>First Author, year</b>                                                                             | <b>Study Design</b>                                                                                                                  | <b>Number of RA cases</b> | <b>Number of Controls</b>          | <b>Cell type</b>                           | <b>Telomere Assay used</b>                                                                                               | <b>Findings</b>                                                                                                                                                            | <b>Ref.</b> |
| Koetz, 2000                                                                                           | Cross-sectional, case-control matched on age                                                                                         | 51                        | 42                                 | CD4+ T cells                               | Southern blotting, hybridization with a telomere repeat-specific <sup>32</sup> P-end-labeled (CCCTAA) <sub>3</sub> probe | In RA patients, LTL did not correlate with age. LTL appeared shorter in RA patients vs. controls <40 years of age.                                                         | 9           |
| Schonland, 2003                                                                                       | Cross-sectional, case-control, unadjusted                                                                                            | unspecified               | 37 HLA-DR4+; 37 HLA DR4 - controls | CD4 + T cells and granulocytes             | As above                                                                                                                 | HLA-DR4+ individuals and RA patients 20-40 years of age had shorter LTL vs. HLA-DR4 -                                                                                      | 13          |
| Steer, 2007                                                                                           | Cross-sectional, case-control, adjusted for age and sex                                                                              | 176                       | 1151                               | WBC                                        | Southern blotting, hybridization with a telomere repeat-specific digoxigenin 3'-end labeled (CCCTAA) <sub>3</sub> probe  | LTL shorter in RA than controls, but not related to RA duration or activity                                                                                                | 34          |
| Colmegna, 2008                                                                                        | Cross-sectional case-control, matched on age, sex and ethnicity                                                                      | 63                        | 48                                 | CD34+ hematopoietic precursor cells (HPCs) | Quantitative PCR                                                                                                         | LTL shorter in RA patients vs. controls<br>LTL in RA did not correlate with RA duration or treatment                                                                       | 14          |
| Current study                                                                                         | Prospective, nested case control, matched on age, cohort, menopause and hormone use status, fasting, time of day of blood collection | 296 (Pre-RA)              | 827                                | WBC                                        | Quantitative PCR                                                                                                         | LTL longer in pre-RA patients vs. controls; no heterogeneity by menopausal status, cytokine levels, age, BMI, seropositivity, HLA-DRB1 status, time since blood collection |             |
